# Supplementary material
Source: publisher figshare collection journal article supplement (https://acs.figshare.com/ndownloader/files/26655469)
Supplement: Supplementary file 1 [file 26655469]

# A New Approach to Design Alarm Filters Using the Plant and Controller Knowledge

Mohammad Hossein Roohi,<sup>\*,†</sup> Tongwen Chen,<sup>†</sup> Zhe Guan,<sup>‡</sup> and Toru Yamamoto<sup>¶</sup>

<sup>†</sup>*Department of Electrical and Computer Engineering, University of Alberta, Edmonton, AB,  
Canada T6G 1H9*

<sup>‡</sup>*Data-Driven Smart Systems Collaborative Research Laboratory, KOBELCO Construction  
Machinery Dream-Driven Co-Creation Research Center, Hiroshima University, 1-4-1  
Kagamiyama, Higashi-Hiroshima, Hiroshima, 739-8527, Japan*

<sup>¶</sup>*Graduate School of Advanced Science and Engineering, Hiroshima University, 1-4-1  
Kagamiyama, Higashi-Hiroshima, Hiroshima, 739-8527, Japan*

E-mail: roohi@ualberta.ca

## 1 Proof of Lemma 1

*Proof.* From the alarm signal formulation (see (8)) we obtain

$$w(z^{-1}) = \lambda_y(z^{-1})y(z^{-1}) + \lambda_u(z^{-1})u(z^{-1}),$$

where  $\lambda_y(z^{-1}) = \lambda_{y_1} + \lambda_{y_2}z^{-1} + \dots + \lambda_{y_r}z^{-r+1}$  and  $\lambda_u(z^{-1}) = \lambda_{u_1} + \lambda_{u_2}z^{-1} + \dots + \lambda_{u_r}z^{-r+1}$ .

Substituting (10) and (11) in the above equation yields

$$w(z^{-1}) = \frac{\lambda_y(z^{-1})f(z^{-1}) + \lambda_u(z^{-1})g(z^{-1})}{(\alpha(z^{-1})f(z^{-1}) - \beta(z^{-1})g(z^{-1}))z^{-\zeta}}v(z^{-1}), \quad (\text{A.1})$$

where  $z^{-\zeta}$  is added in the denominator to make the transfer function proper. The numerator degree of transfer function in (A.1) is  $r + l - 2$  and the denominator degree is  $l + \max(p, q) - 2$ . So we set  $\zeta = r - \max(p, q)$  to have a proper transfer function. For derivation of (A.1), the terms that are associated with  $b$  are excluded as they are constant in the steady-state and do not affect the variance. This transfer function can be represented in the state-space form where the system matrices are

$$\begin{aligned}\mathcal{A} &= \left[ \begin{array}{c|c} \mathbf{0}^T & I \\ \hline [\mathbf{0}_\zeta \ \boldsymbol{\beta} * \boldsymbol{g} - \boldsymbol{\alpha} * \boldsymbol{f}] & \end{array} \right], \\ \mathcal{B} &= [\mathbf{0} \ 1]^T, \\ \mathcal{C} &= \lambda_y * \boldsymbol{f} + \lambda_u * \boldsymbol{g}, \\ \mathcal{D} &= 0.\end{aligned}$$

According to Ref. 1, the state covariance of this system can be found by solving the following Lyapunov equation

$$\mathcal{A}\Psi\mathcal{A}^T - \Psi + \mathcal{B}\mathcal{B}^T = 0. \quad (\text{A.2})$$

As we have assumed that the controller is stabilizing, a solution for (A.2) can be found as

$$\Psi = \sum_{i=0}^{\infty} \mathcal{A}^i \mathcal{B}^T \mathcal{B} (\mathcal{A}^T)^i.$$

Finally, the output variance is given by  $\sigma_w^2 = \mathcal{C}\Psi\mathcal{C}^T\sigma_v^2$ , which completes the proof.  $\square$

## 2 Proof of Lemma 2

*Proof.* The integral is evaluated as

$$\frac{\sqrt{\pi}}{\sqrt{2}\kappa_2^2}(\theta_1 + \theta_3)\text{erf}\left(\frac{\kappa_1 + \tau}{\sqrt{2}\kappa_2}\right) - \frac{\theta_2\kappa_2^2 + \theta_3(\kappa_1 + \tau)}{\kappa_2^3}e^{-\frac{(\kappa_1 + \tau)^2}{2\kappa_2^2}} + c,$$

where  $\text{erf}(\cdot)$  indicates the error function. As  $\theta_1 = -\theta_3$ , the proof is complete.  $\square$

## 3 Proof of Proposition 1

*Proof.* After some math operation, the second derivative of the cost function is obtained as

$$\frac{\partial^2 J}{\partial \lambda^{*2}} = (\bar{H}\lambda^* \mathbf{1}_{fg}^T + \mathbf{1}_{fg}^T \lambda^* \bar{H} - 2\bar{H}\lambda^* \mathbf{1}_{fg}) \frac{e^{-\frac{w_{fp}^*{}^2}{2\sigma_w^2}}}{2\sqrt{2\pi}\sigma_w^3}. \quad (\text{A.3})$$

Here, the term  $\frac{e^{-\frac{w_{fp}^*{}^2}{2\sigma_w^2}}}{2\sqrt{2\pi}\sigma_w^3}$  is non-negative. Substituting the optimal answer in  $\bar{H}\lambda^* \mathbf{1}_{fg}^T - \mathbf{1}_{fg}^T \lambda^* \bar{H} - 2\bar{H}\lambda^* \mathbf{1}_{fg}$  yields  $\bar{H}(\mathbf{1}_{fg}\bar{H}^{-1}\mathbf{1}_{fg}^T) - \mathbf{1}_{fg}^T \mathbf{1}_{fg}$ . To show that this is positive semi-definite we use Schur's complement lemma (see Ref. 2). According to this lemma we need to prove that the following statement holds

$$\begin{bmatrix} \bar{H}(\mathbf{1}_{fg}\bar{H}^{-1}\mathbf{1}_{fg}^T) & \mathbf{1}_{fg}^T \\ \mathbf{1}_{fg} & 1 \end{bmatrix} \succeq 0. \quad (\text{A.4})$$

Let us define  $\Phi \triangleq \bar{H}(\mathbf{1}_{fg}\bar{H}^{-1}\mathbf{1}_{fg}^T)$ . As  $\bar{H}$  is positive definite, so is  $\bar{H}^{-1}$ , which yields  $\mathbf{1}_{fg}\bar{H}^{-1}\mathbf{1}_{fg}^T \geq 0$ . Hence,  $\Phi$  is positive definite and invertible. The matrix in (A.4) can be decomposed as

$$\begin{bmatrix} \Phi & \mathbf{1}_{fg}^T \\ \mathbf{1}_{fg} & 1 \end{bmatrix} = \begin{bmatrix} I \\ \mathbf{1}_{fg}\Phi^{-1} \end{bmatrix} \Phi \begin{bmatrix} I & \Phi^{-1}\mathbf{1}_{fg}^T \end{bmatrix} + \begin{bmatrix} 0 & 0 \\ 0 & 1 - \mathbf{1}_{fg}\Phi^{-1}\mathbf{1}_{fg}^T \end{bmatrix}. \quad (\text{A.5})$$

It can be verified that  $1 - \mathbf{1}_{fg}\Phi^{-1}\mathbf{1}_{fg}^T = 0$ . Considering the positive definiteness of  $\Phi$  and based on the equation in (A.5) we conclude that (A.4) holds.  $\square$

## 4 Proof of Corollary 1

*Proof.* In case that we have no information from the plant and the controller, both  $u$  and  $y$  are modeled as random processes where the samples are independent and identically distributed. Moreover, in the conventional linear filters,  $u$  and  $y$  were not combined. So to interpret the conventional approach according to the proposed method we assume that  $u(k)$  and  $y(k)$  are the same. Now we have

$$y(k) = v(k) + b, \quad (\text{A.6})$$

$$u(k) = v(k) + b, \quad (\text{A.7})$$

where  $v(k), k \in \{1, 2, \dots\}$ , follow a Gaussian distribution and  $b$  is defined in (4). By comparing (A.6) and (A.7) with (11) and (10) we determine  $f = 1$ ,  $g = 1$  and  $\alpha(z^{-1})f(z^{-1}) - \beta(z^{-1})g(z^{-1}) = 1$ . From Lemma 1 we find  $\Psi = I$ . Furthermore we obtain  $H_f = G_g = I$  and hence  $\bar{H} = \begin{bmatrix} I & I \\ I & I \end{bmatrix}$ ; thus the optimal filter is obtained as  $\lambda^* = c [0.5 \ 0.5 \ \dots \ 0.5]$ . This means that the optimal solution in the conventional framework is the case that all filter coefficients are equal.  $\square$

## 5 Proof of Lemma 3

*Proof.* The cost function  $J$  considering the optimal trip-point is given by

$$J = \eta_m \int_{-\infty}^{w_{\text{tp}}^*} \frac{1}{\sqrt{2\pi}\sigma_w} e^{-\frac{(\tau - \mu_w)^2}{2\sigma_w^2}} d\tau + \eta_f \int_{w_{\text{tp}}^*}^{\infty} \frac{1}{\sqrt{2\pi}\sigma_w} e^{-\frac{\tau^2}{2\sigma_w^2}} d\tau. \quad (\text{A.8})$$

As the alarm signal follows a Gaussian distribution, we have  $\mu_{w_c} = c\mu_w$  and  $\sigma_{w_c}^2 = c^2\sigma_w^2$ , where  $\mu_{w_c}$  and  $\sigma_{w_c}^2$  are the mean and the variance of  $w_c$ , respectively. Furthermore, from (18) we have

$$w_{\text{tp}_c}^* = \frac{c\mu_w}{2} - \frac{c^2\sigma_w^2}{c\mu_w} \ln\left(\frac{\eta_f}{\eta_m}\right), \quad (\text{A.9})$$

where  $w_{\text{tp}}^*$  corresponds to the optimal trip-point calculated for  $w_c$ . By comparing (18) and (A.9) we conclude that  $w_{\text{tp}_c}^* = cw_{\text{tp}}^*$ . Now  $J_c$  can be obtained as

$$J_c = \eta_m \int_{-\infty}^{cw_{\text{tp}}^*} \frac{1}{\sqrt{2\pi c\sigma_w}} e^{-\frac{(\tau - c\mu_w)^2}{2c^2\sigma_w^2}} d\tau + \eta_f \int_{cw_{\text{tp}}^*}^{\infty} \frac{1}{\sqrt{2\pi c\sigma_w}} e^{-\frac{\tau^2}{2c^2\sigma_w^2}} d\tau.$$

After some modification we have

$$J_c = \eta_m \int_{-\infty}^{cw_{\text{tp}}^*} \frac{1}{\sqrt{2\pi\sigma_w}} e^{-\frac{(\frac{\tau}{c} - \mu_w)^2}{2\sigma_w^2}} \frac{1}{c} d\tau + \eta_f \int_{cw_{\text{tp}}^*}^{\infty} \frac{1}{\sqrt{2\pi\sigma_w}} e^{-\frac{(\frac{\tau}{c})^2}{2\sigma_w^2}} \frac{1}{c} d\tau.$$

Substituting  $\tau_c \triangleq \frac{\tau}{c}$  yields

$$J_c = \eta_m \int_{-\infty}^{w_{\text{tp}}^*} \frac{1}{\sqrt{2\pi\sigma_w}} e^{-\frac{(\tau_c - \mu_w)^2}{2\sigma_w^2}} d\tau_c + \eta_f \int_{w_{\text{tp}}^*}^{\infty} \frac{1}{\sqrt{2\pi\sigma_w}} e^{-\frac{\tau_c^2}{2\sigma_w^2}} d\tau_c. \quad (\text{A.10})$$

By comparing (A.8) and (A.10) we can infer that  $J_c = J$ , and the proof is complete.  $\square$

## References

- (1) Bryson, A. E. *Applied Optimal Control: Optimization, Estimation and Control*; CRC Press, 1975.
- (2) Zhang, F. *The Schur Complement and its Applications*; Springer Science & Business Media, 2006.
